# Supplementary material for: The removal of multiplicative, systematic bias allows integration of breast cancer gene expression datasets – improving meta-analysis and prediction of prognosis
Source: PubMed Central journal article supplement (PMC2563019; doi:10.1186/1755-8794-1-42), 2008-09-21
Supplement: 1755-8794-1-42-S2.pdf [file 1755-8794-1-42-S2.pdf]

**Additional File 2. Concordance of mean expression values of data generated from different experiments.**

|                           | Data from different validation experiments                                                              | Probesets | Before |        | After |        |
|---------------------------|---------------------------------------------------------------------------------------------------------|-----------|--------|--------|-------|--------|
|                           |                                                                                                         |           | MCF7   | MCF10A | MCF7  | MCF10A |
| Amplified and unamplified | Amplified 10ng and unamplified 10µg protocols, RMA, Affymetrix cdf summarisation (see Figure 1D)        | 22283     | 0.959  | 0.936  | 0.994 | 0.994  |
|                           | Amplified 10ng and unamplified 10µg protocols, MAS5 (present ≥ 4/6 chips), Affymetrix cdf summarisation | 9783      | 0.928  | 0.925  | 0.990 | 0.998  |
|                           | Amplified 10ng and unamplified 10µg protocols, RMA, Unigene cdf summarisation                           | 11707     | 0.956  | 0.933  | 0.994 | 0.993  |
|                           | Amplified 10ng and unamplified 10µg protocols, MAS5 (present ≥ 4/6 chips), Unigene cdf summarisation    | 4729      | 0.901  | 0.819  | 0.987 | 0.985  |
| Plus 2.0 and U133A        | U133A and plus 2.0 arrays, RMA, common Affymetrix cdf summarisation probesets                           | 22277     | 0.934  | 0.869  | 0.984 | 0.984  |
|                           | U133A and plus 2.0 arrays, MAS5 (present ≥ 4/6 chips), common Affymetrix cdf summarisation probesets    | 11198     | 0.937  | 0.844  | 0.969 | 0.968  |
|                           | U133A and plus 2.0 arrays, RMA, common Unigene cdf summarisation                                        | 11656     | 0.889  | 0.811  | 0.980 | 0.979  |
|                           | U133A and plus 2.0 arrays, MAS5 (present ≥ 4/6 chips), common Unigene cdf summarisation                 | 5740      | 0.840  | 0.725  | 0.962 | 0.958  |
| Exon and plus 2.0         | Exon v U133 plus 2 (consensus mapping) Plier and MAS5, Affymetrix cdf summarisation                     | 44280     | 0.626  | 0.595  | 0.933 | 0.932  |
|                           | Exon v U133 plus 2 (SIF mapping) Plier and MAS5, Affymetrix cdf summarisation                           | 13730     | 0.591  | 0.559  | 0.946 | 0.947  |
| New standard protocol     | Standard 10µg and revised 2µg protocols, RMA, Affymetrix cdf summarisation                              | 22283     | 0.983  | 0.977  | 0.996 | 0.996  |
|                           | Standard 10µg and revised 2µg protocols, MAS5 (present ≥ 4/6 chips), Affymetrix cdf summarisation       | 10568     | 0.946  | 0.934  | 0.976 | 0.974  |
|                           | Standard 10µg and revised 2µg protocols, RMA, Affymetrix cdf summarisation                              | 10280     | 0.969  | 0.962  | 0.986 | 0.984  |
|                           | Standard 10µg and revised 2µg protocols, MAS5, (present ≥ 4/6 chips), Unigene cdf summarisation         | 5175      | 0.937  | 0.922  | 0.972 | 0.969  |
| Scanners                  | GeneChip 3000 and GeneArray 2500 scanners, RMA, Affymetrix cdf summarisation                            | 22283     | 0.999  | 0.999  | 1.000 | 1.000  |
|                           | GeneChip 3000 and GeneArray 2500 scanners, MAS5 (present ≥ 12/18 chips), Affymetrix cdf summarisation   | 9762      | 0.999  | 0.998  | 0.999 | 0.999  |
|                           | GeneChip 3000 and GeneArray 2500 scanners, RMA, Unigene cdf summarisation                               | 11707     | 0.999  | 0.999  | 1.000 | 1.000  |
|                           | GeneChip 3000 and GeneArray 2500 scanners, MAS5 (present ≥ 12/18 chips), Unigene cdf summarisation      | 5588      | 0.999  | 0.998  | 0.999 | 0.999  |
| Amplification protocols   | NuGEN 10ng and EpiStem 2ng amplification, RMA, Affymetrix cdf summarisation                             | 54675     | 0.893  | 0.893  | 0.993 | 0.993  |
|                           | NuGEN 10ng and EpiStem 2ng amplification, MAS5 (present ≥ 4/6 chips), Affymetrix cdf summarisation      | 20958     | 0.821  | 0.828  | 0.990 | 0.992  |
|                           | NuGEN 10ng and EpiStem 2ng amplification, RMA, Unigene cdf summarisation                                | 11707     | 0.897  | 0.895  | 0.991 | 0.991  |
|                           | NuGEN 10ng and EpiStem 2ng amplification, MAS5 (present ≥ 4/6 chips), Unigene cdf summarisation         | 95        | 0.710  | 0.533  | 0.795 | 0.643  |

Pearson correlation coefficients are given for uncorrected and mean batch-corrected data, for RMA and MAS5 data, and using alternative cdf files [5]
