# Supplementary material for: The removal of multiplicative, systematic bias allows integration of breast cancer gene expression datasets – improving meta-analysis and prediction of prognosis
Source: PubMed Central journal article supplement (PMC2563019; doi:10.1186/1755-8794-1-42), 2008-09-21
Supplement: 1755-8794-1-42-S3.pdf [file 1755-8794-1-42-S3.pdf]

**Additional File 3. The top 50 differentially expressed probesets between basal and non basal-like/ luminal tumours were identified across datasets.**

| SAM common (Richardson <i>et al.</i> 18 basal v Farmer <i>et al.</i> 27 luminal AND Farmer <i>et al.</i> 16 basal v Richardson <i>et al.</i> 20 non basal-like) |                              |
|-----------------------------------------------------------------------------------------------------------------------------------------------------------------|------------------------------|
| Before mean-centering                                                                                                                                           | After mean-centering         |
| ARFRP1 (215984_s_at)                                                                                                                                            | unknown (215375_x_at)        |
| ZFP36L2 (201369_s_at)                                                                                                                                           | S100A1 (205334_at)           |
| RPL27A (203034_s_at)                                                                                                                                            | unknown (215686_x_at)        |
| unknown (215182_x_at)                                                                                                                                           | MFGE8 (210605_s_at)          |
| PTMS (218045_x_at)                                                                                                                                              | KIAA0182 (212056_at)         |
| PTK7 (207011_s_at)                                                                                                                                              | GABRP (205044_at)            |
| ZFP36L2 (201367_s_at)                                                                                                                                           | TFAP2B (214451_at)           |
| FLOT2 (211299_s_at)                                                                                                                                             | CHI3L2 (213060_s_at)         |
| RPL32 (200674_s_at)                                                                                                                                             | ESR1 (211234_x_at)           |
| RAB14 (211503_s_at)                                                                                                                                             | RAI17 (212124_at)            |
| GNS (203676_at)                                                                                                                                                 | LAMA5 (210150_s_at)          |
| PTK9 (214007_s_at)                                                                                                                                              | C4A_///_C4B (208451_s_at_at) |
| GSTM4 (204149_s_at)                                                                                                                                             | COL6A3 (201438_at)           |
| STAT6 (201332_s_at)                                                                                                                                             | CBR1 (209213_at)             |
| NUMA1 (214251_s_at)                                                                                                                                             | XBP1 (200670_at)             |
| SENP3 (203871_at)                                                                                                                                               | FABP7 (205030_at)            |
| UBE1 (200964_at)                                                                                                                                                | ERBB2 (216836_s_at)          |
| PEA15 (200787_s_at)                                                                                                                                             | CDC42EP4 (218063_s_at)       |
| PTP4A2 (208615_s_at)                                                                                                                                            | KIAA0310 (215696_s_at)       |
| SENP3 (215113_s_at)                                                                                                                                             | FZD7 (203705_s_at)           |
| PPP1R15A (202014_at)                                                                                                                                            | GSTP1 (200824_at)            |
| PIP5K1A (210256_s_at)                                                                                                                                           | GATA3 (209604_s_at)          |
| PLXNB1 (215807_s_at)                                                                                                                                            | TLE3 (212770_at)             |
| PPP2CB (201374_x_at)                                                                                                                                            | ASAHI (213702_x_at)          |
| HSF2 (209657_s_at)                                                                                                                                              | VAV3 (218807_at)             |
| AGXT (210327_s_at)                                                                                                                                              | ESR1 (211235_s_at)           |
| unknown (214008_at)                                                                                                                                             | ESR1 (217190_x_at)           |
|                                                                                                                                                                 | VAV3 (218806_s_at)           |

Those probesets in common are listed. Before: comparison was performed prior to mean batch-centering. After: comparison was performed following mean batch-centering.
