# Supplementary material for: The removal of multiplicative, systematic bias allows integration of breast cancer gene expression datasets – improving meta-analysis and prediction of prognosis
Source: PubMed Central journal article supplement (PMC2563019; doi:10.1186/1755-8794-1-42), 2008-09-21
Supplement: 1755-8794-1-42-S4.pdf [file 1755-8794-1-42-S4.pdf]

**Additional File 4. Summary of the effect of mean batch-centering on data generated from published studies.**

|                                                                                                       | SAM Common                                                                      |    |                                                                                     |    |
|-------------------------------------------------------------------------------------------------------|---------------------------------------------------------------------------------|----|-------------------------------------------------------------------------------------|----|
|                                                                                                       | Richardson <i>et al.</i> 18 basal v<br>Farmer <i>et al.</i> 27 luminal (top 50) |    | Farmer <i>et al.</i> 16 basal v Richardson <i>et al.</i> 20 non basal-like (top 50) |    |
|                                                                                                       | UC                                                                              | MC | UC                                                                                  | MC |
| Farmer <i>et al.</i> 16 basal v 27 luminal (top 50)                                                   | 1                                                                               | 8  | 2                                                                                   | 31 |
| Richardson <i>et al.</i> 18 basal v 20 luminal (top 50)                                               | 2                                                                               | 6  | 4                                                                                   | 26 |
| Common to both Farmer <i>et al.</i> and Richardson <i>et al.</i> Luminal v Basal (total 13 probesets) | 0                                                                               | 4  | 0                                                                                   | 8  |

Lists of the top 50 differentially expressed probesets between basal and non basal-like/ luminal tumours were identified within and across datasets, before and after mean batch-centering. SAM Common: for each column two different pairwise comparisons using SAM were performed, and the top 50 probesets identified for each comparison. The number reported is the intersection between two lists. UC = uncorrected. MC = Mean centering correction.
