# Supplementary material for: The removal of multiplicative, systematic bias allows integration of breast cancer gene expression datasets – improving meta-analysis and prediction of prognosis
Source: PubMed Central journal article supplement (PMC2563019; doi:10.1186/1755-8794-1-42), 2008-09-21

# Additional File 10

**A**

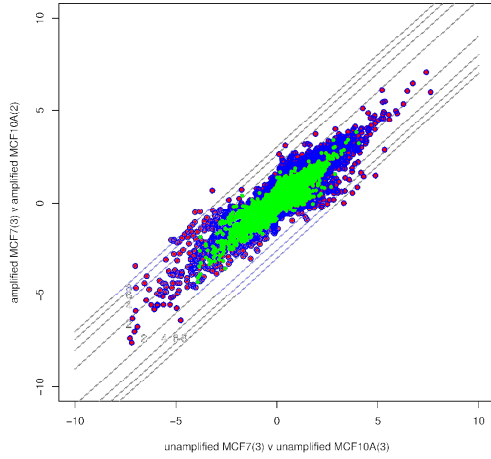

**B**

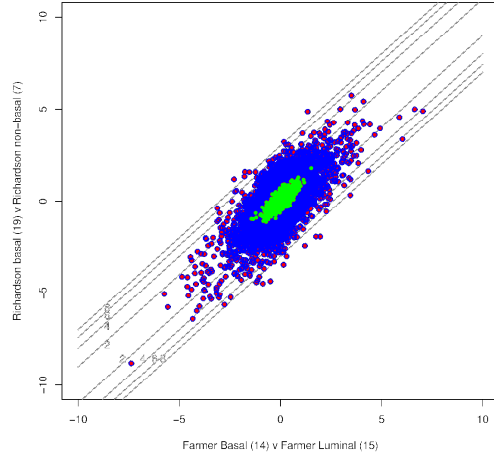

**C**

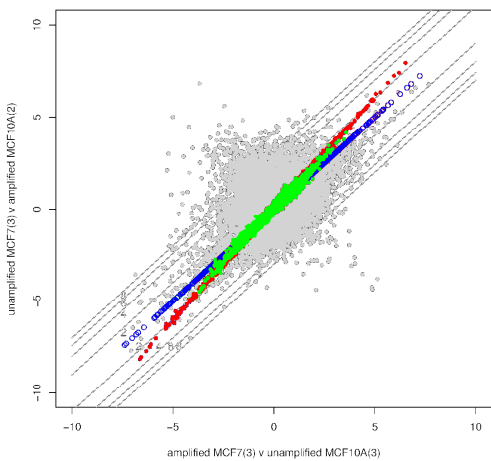

**D**

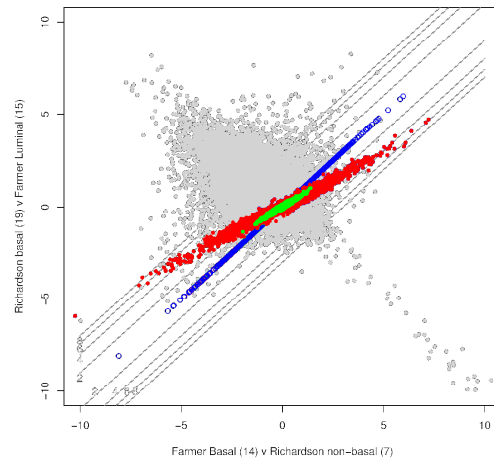

**E**

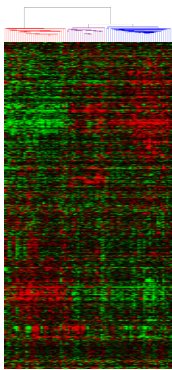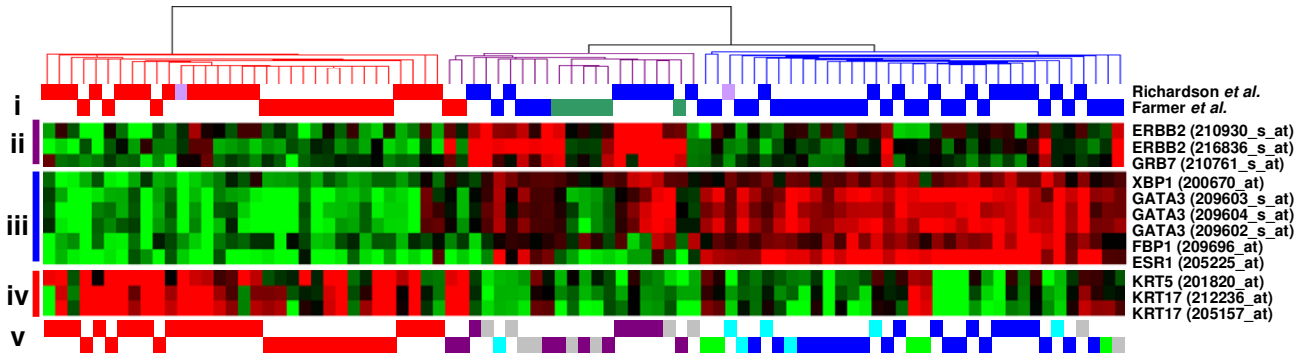

Supplement: 1755-8794-1-42-S10.pdf [file 1755-8794-1-42-S10.pdf]
